# Supplementary material
Source: publisher site journal article supplement (https://www.spandidos-publications.com/7156/downloadSupplementary)
Supplement: Supplementary file 1 [file downloadSupplementary]

## Sheet: Sheet1
Table SIII. GSVA analysis on KEGG terms based on the different genes between high- and low-risk groups.
id	logFC	AveExpr	t	P.Value	adj.P.Val	B
KEGG_FATTY_ACID_METABOLISM	0.158275	-0.00227285	7.07739	4.7x10^-12	5.0x10^-10	16.9031
KEGG_ALPHA_LINOLENIC_ACID_METABOLISM	0.16845	0.0167894	7.05569	5.4x10^-12	5.0x10^-10	16.7666
KEGG_MATURITY_ONSET_DIABETES_OF_THE_YOUNG	0.179133	0.0606695	6.69269	5.6x10^-11	3.4x10^-9	14.5335
KEGG_AXON_GUIDANCE	-0.101504	-0.0107642	-6.55031	1.3x10^-10	6.3x10^-9	13.6847
KEGG_NICOTINATE_AND_NICOTINAMIDE_METABOLISM	0.117569	0.00272392	6.39609	3.5x10^-10	1.3x10^-8	12.7826
KEGG_DRUG_METABOLISM_CYTOCHROME_P450	0.158515	0.0216657	6.32657	5.3x10^-10	1.6x10^-8	12.382
KEGG_TYROSINE_METABOLISM	0.12627	0.0135914	6.16883	1.3x10^-9	3.6x10^-8	11.4868
KEGG_ASTHMA	0.206373	0.0342305	6.09054	2.1x10^-9	5.0x10^-8	11.0497
KEGG_HEMATOPOIETIC_CELL_LINEAGE	0.162774	0.00826534	5.97407	4.2x10^-9	8.7x10^-8	10.4085
KEGG_FRUCTOSE_AND_MANNOSE_METABOLISM	0.137608	-0.0103601	5.85235	8.5x10^-9	1.5x10^-7	9.74981
KEGG_INTESTINAL_IMMUNE_NETWORK_FOR_IGA_PRODUCTION	0.179292	0.00498037	5.712	1.8x10^-8	3.1x10^-7	9.0051
KEGG_TYPE_I_DIABETES_MELLITUS	0.189661	0.0173452	5.61501	3.1x10^-8	4.5x10^-7	8.49974
KEGG_GRAFT_VERSUS_HOST_DISEASE	0.212779	0.0146608	5.5715	4.0x10^-8	5.3x10^-7	8.27551
KEGG_LEISHMANIA_INFECTION	0.147149	0.00213199	5.45786	7.4x10^-8	9.1x10^-7	7.69722
KEGG_METABOLISM_OF_XENOBIOTICS_BY_CYTOCHROME_P450	0.135792	0.0198144	5.31708	1.5x10^-7	1.8x10^-6	6.99549
KEGG_NATURAL_KILLER_CELL_MEDIATED_CYTOTOXICITY	0.111064	0.0103452	5.28993	1.8x10^-7	1.9x10^-6	6.86206
KEGG_STEROID_HORMONE_BIOSYNTHESIS	0.117945	0.0285005	5.21849	2.6x10^-7	2.6x10^-6	6.51387
KEGG_CYTOKINE_CYTOKINE_RECEPTOR_INTERACTION	0.112564	0.014904	4.99839	7.8x10^-7	7.2x10^-6	5.468
KEGG_AMINO_SUGAR_AND_NUCLEOTIDE_SUGAR_METABOLISM	0.117655	-0.0029178	4.96369	9.3x10^-7	7.8x10^-6	5.30682
KEGG_ALLOGRAFT_REJECTION	0.191266	0.0128071	4.96322	9.3x10^-7	7.8x10^-6	5.30463
KEGG_GLUTATHIONE_METABOLISM	0.100249	-0.00949996	4.8598	1.5x10^-6	1.2x10^-5	4.8304
KEGG_GLYCOSPHINGOLIPID_BIOSYNTHESIS_LACTO_AND_NEOLACTO_SERIES	0.104043	-0.00158799	4.80339	2.0x10^-6	1.5x10^-5	4.57556
KEGG_BUTANOATE_METABOLISM	0.106927	0.00330525	4.73561	2.8x10^-6	2.0x10^-5	4.27293
KEGG_MISMATCH_REPAIR	-0.159981	-0.0319605	-4.68215	3.6x10^-6	2.5x10^-5	4.03703
KEGG_AUTOIMMUNE_THYROID_DISEASE	0.154741	0.0444156	4.65124	4.1x10^-6	2.8x10^-5	3.90176
KEGG_COMPLEMENT_AND_COAGULATION_CASCADES	0.119788	0.0233165	4.57125	6.0x10^-6	3.8x10^-5	3.55556
KEGG_BASAL_TRANSCRIPTION_FACTORS	-0.113624	-0.0126768	-4.50625	8.1x10^-6	4.9x10^-5	3.27826
KEGG_PRIMARY_BILE_ACID_BIOSYNTHESIS	0.105689	0.00878563	4.48338	9.0x10^-6	5.3x10^-5	3.18157
KEGG_LINOLEIC_ACID_METABOLISM	0.120169	0.0108779	4.39604	1.3x10^-5	7.4x10^-5	2.81655
KEGG_SYSTEMIC_LUPUS_ERYTHEMATOSUS	0.131742	0.0158602	4.27596	2.2x10^-5	0.000110504	2.32552
KEGG_ASCORBATE_AND_ALDARATE_METABOLISM	0.111688	0.0337368	4.27387	2.2x10^-5	0.000110504	2.31711
KEGG_ANTIGEN_PROCESSING_AND_PRESENTATION	0.116309	0.0222381	4.15952	3.7x10^-5	0.000175786	1.86151
KEGG_OTHER_GLYCAN_DEGRADATION	0.109759	0.0117769	3.98287	7.7x10^-5	0.000324969	1.18044
KEGG_SPLICEOSOME	-0.117277	-0.0244881	-3.88427	0.000115764	0.000453203	0.812385
KEGG_ONE_CARBON_POOL_BY_FOLATE	-0.104973	-0.0328484	-3.78326	0.000172629	0.000622819	0.44433
KEGG_DNA_REPLICATION	-0.131991	-0.0308954	-3.65067	0.000287773	0.000962733	-0.0248292
KEGG_RIBOSOME	0.14439	-0.0136195	3.50526	0.000495216	0.00157103	-0.521065
KEGG_PRIMARY_IMMUNODEFICIENCY	0.109027	-0.00939476	3.27602	0.00112244	0.00299316	-1.2643
